# Supplementary material for: Direct Evidence of Lack of Colocalisation of Fluorescently Labelled Gold Labels Used in Correlative Light Electron Microscopy
Source: PubMed Central journal article supplement (PMC5357795; doi:10.1038/srep44666), 2017-03-20
Supplement: srep44666-s1.pdf [file srep44666-s1.pdf]

# Supporting Information for: Direct Evidence of Lack of Colocalisation of Fluorescently Labelled Gold Labels Used in Correlative Light Electron Microscopy

**Benjamin T. Miles<sup>1,+</sup>, Alexander B. Greenwood<sup>1,+</sup>, David Benito-Alifonso<sup>2</sup>, Hugh Tanner<sup>3,5</sup>, M. Carmen Galan<sup>2</sup>, Paul Verkade<sup>4,5</sup>, and Henkjan Gersen<sup>1,3,\*</sup>**

<sup>1</sup>Nanophotonics and Nanophysics Group, H.H. Wills Physics Laboratory, University of Bristol, Bristol, BS8 1TL, UK

<sup>2</sup>School of Chemistry, University of Bristol, Cantock's Close, Bristol, BS8 1TS, UK

<sup>3</sup>Bristol Centre for Functional Nanomaterials, H.H. Wills Physics Laboratory, University of Bristol, Bristol, BS8 1TL, UK

<sup>4</sup>Wolfson Bioimaging Facility, University of Bristol, Bristol, BS8 1TD, UK

<sup>5</sup>School of Biochemistry, University of Bristol, Bristol, BS8 1TD, UK

\*h.gersen@bristol.ac.uk

Diffusion ordered NMR spectroscopy (DOSY) measurements were performed using a Varian VNMR500 spectrometer with a direct probe at 298 K. A pulsed gradient duration of 2 ms incremented from 3.9 to 45.5 G cm<sup>-1</sup> in 15 steps and a diffusion time of 50 ms. DOSY measurements of a sample of NP-A-633 showed the presence of a set of signals corresponding to Streptavidin-Alexa633 with diffusion coefficients between 0.3-0.5x10<sup>-10</sup> ms<sup>-2</sup>. Peaks at higher diffusion coefficients corresponding to unbound citrate (3.2x10<sup>-10</sup> ms<sup>-2</sup>), used to stabilize gold nanoparticles, were also observed.

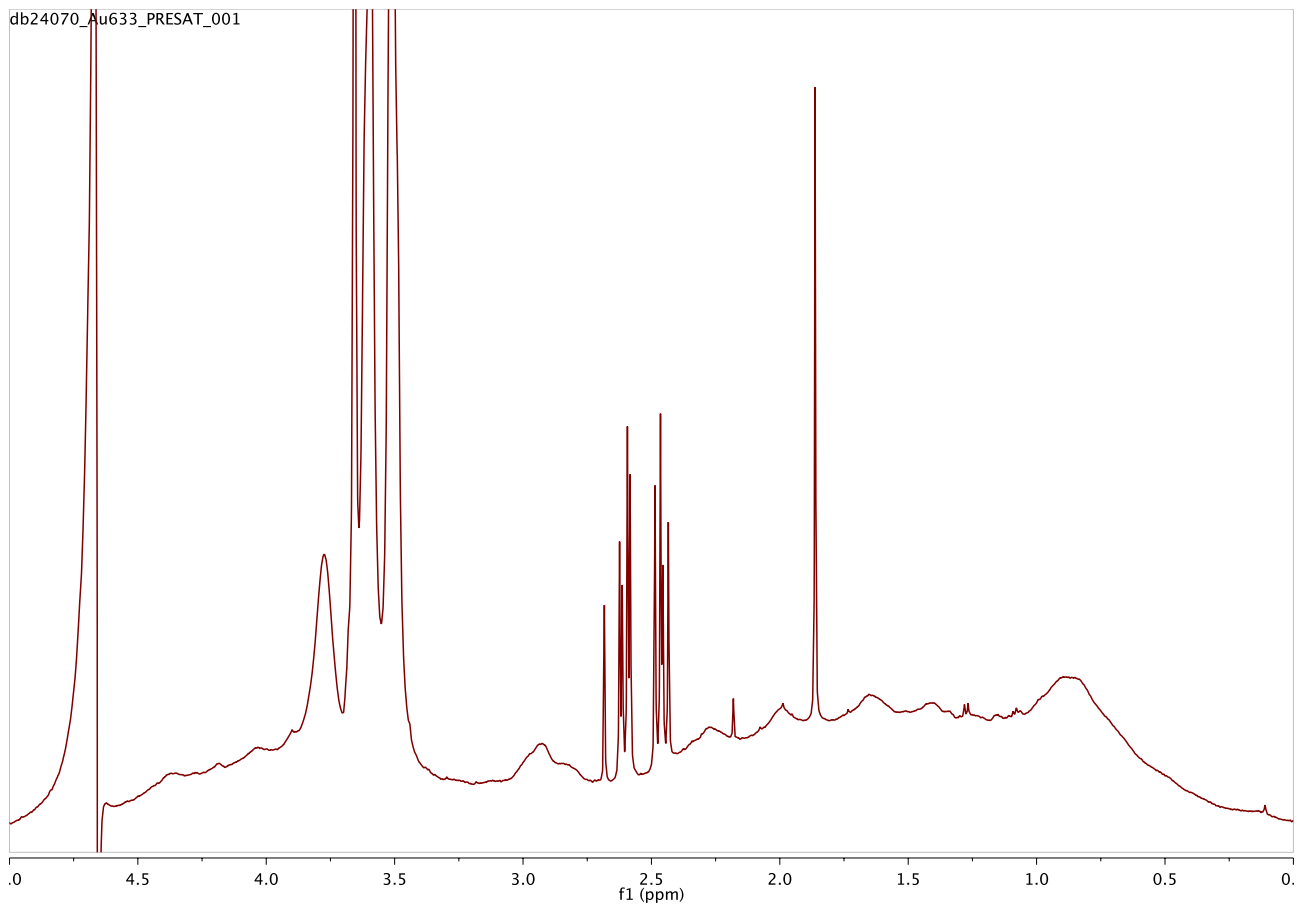

**Figure 1.**  $^1\text{H}$  NMR of Streptavidin-Alexa633

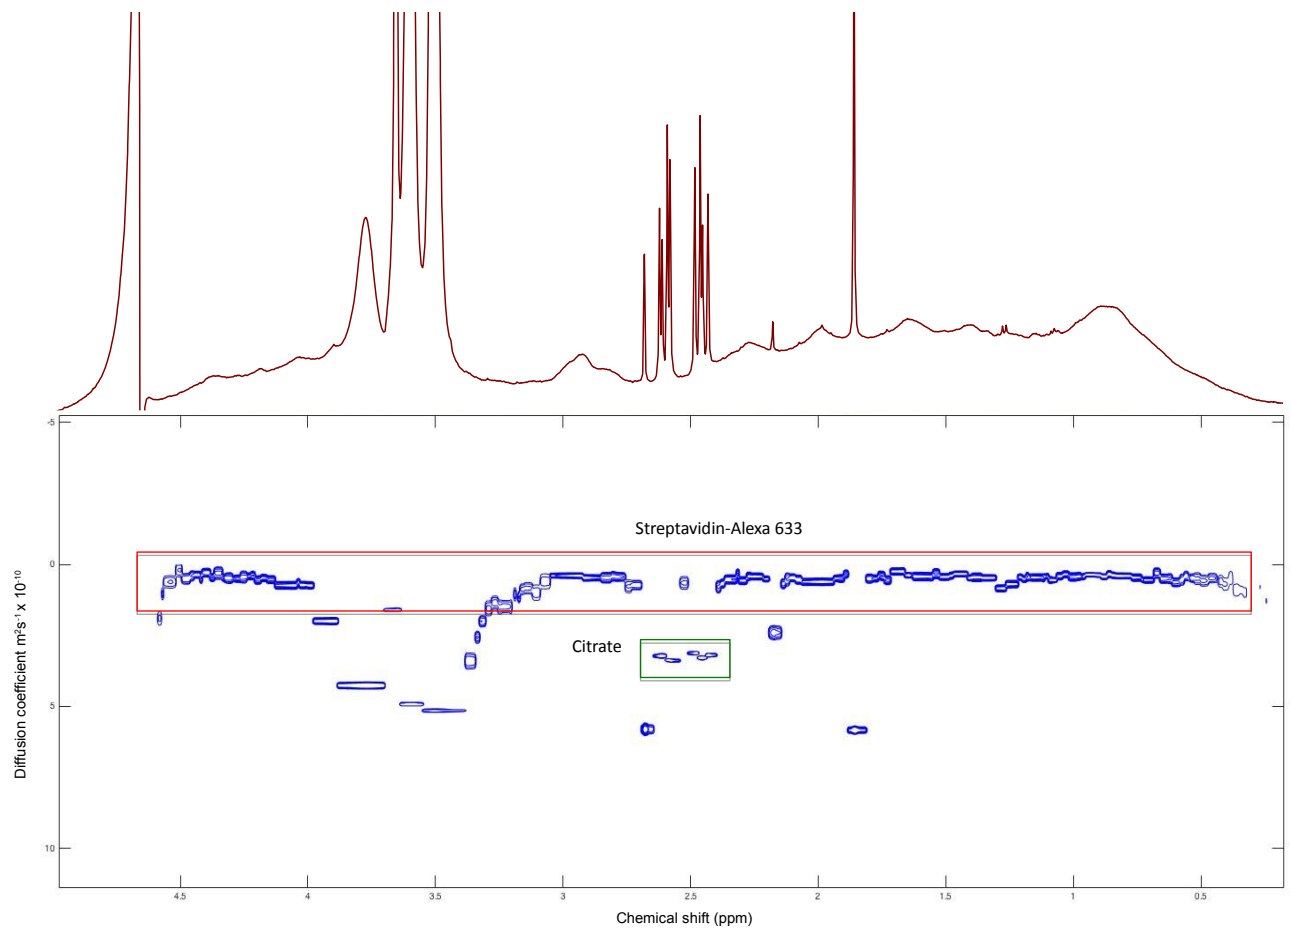

**Figure 2.** DOSY of NP-A-633
